# Supplementary material for: Are TiO2 nanoparticles safe for photocatalysis in aqueous media?
Source: Royal Society of Chemistry journal article supplement (doi:10.1039/d0na00584c), 2020-01-01
Supplement: d0na00584c1.pdf [file d0na00584c1.pdf]

**Table S1** - Statistical analysis of TiO<sub>2</sub> embryotoxic risk at different developmental traits of zebrafish. Abbreviations stand for: h<sub>pf</sub> - hours post-fertilization; NOAEL - highest concentration at which there was not registered a statistically relevant toxic or adverse effect. Test range of TiO<sub>2</sub> pristine material and thermo-treated nanoparticles: 0-100 mg.L<sup>-1</sup>. Test range of TiO<sub>2</sub> released at catalyst reuse: 0-4.25 mg.L<sup>-1</sup>.

|                         | h <sub>pf</sub> | Indep. variables             | Analysis        | TiO <sub>2</sub> pristine material | NOAEL                   | TiO <sub>2</sub> thermo-treated | NOAEL                   | TiO <sub>2</sub> released (reuse) | NOAEL                   |
|-------------------------|-----------------|------------------------------|-----------------|------------------------------------|-------------------------|---------------------------------|-------------------------|-----------------------------------|-------------------------|
| Structural Benchmarks   | 8               | <i>epipolic arc</i>          | one-way ANOVA   | $F(5,111)=2.199; P=0.060$          | 100 mg.L <sup>-1</sup>  | $F(5,109)=3.758; P<0.050$       | 0.1 mg.L <sup>-1</sup>  | $F(3,74)=2.630; P=0.056$          | 4.25 mg.L <sup>-1</sup> |
|                         | 8               | <i>yolk volume</i>           | ANCOVA          | $F(5,107)=2.250; P=0.055$          | 100 mg.L <sup>-1</sup>  | $F(5,73)=7.845; P<0.050$        | 10 mg.L <sup>-1</sup>   | $F(3,73)=2.169; P=0.099$          | 4.25 mg.L <sup>-1</sup> |
|                         | 32              | <i>head-trunk angle</i>      | one-way ANOVA   | $F(4,74)=0.722; P=0.580$           | 100 mg.L <sup>-1</sup>  | $F(5,96)=2.562; P<0.050$        | 10 mg.L <sup>-1</sup>   | $F(3,73)=2.044; P=0.115$          | 4.25 mg.L <sup>-1</sup> |
|                         | 56              | <i>pupil surface</i>         | one-way ANOVA   | $F(4,73)=7.177; P<0.050$           | 0 mg.L <sup>-1</sup>    | $F(4,86)=11.550; P<0.050$       | 0.01 mg.L <sup>-1</sup> | $F(3,72)=1.446; P=0.237$          | 4.25 mg.L <sup>-1</sup> |
|                         | 56              | <i>yolk extension</i>        | ANCOVA          | $F(5,54)=1.720; P=0.146$           | 100 mg.L <sup>-1</sup>  | $F(5,82)=5.421; P<0.050$        | 1 mg.L <sup>-1</sup>    | $F(3,46)=15.346; P<0.050$         | 0 mg.L <sup>-1</sup>    |
|                         | 56              | <i>total body length</i>     | one-way ANOVA   | $F(5,55)=2.268; P=0.060$           | 100 mg.L <sup>-1</sup>  | $F(5,83)=2.711; P<0.050$        | 0 mg.L <sup>-1</sup>    | $F(3,47)=16.054; P<0.050$         | 0 mg.L <sup>-1</sup>    |
| Neuro-Motor Performance | 32              | <i>spontaneous movements</i> | one-way ANOVA   | $F(5,24)=5.952; P<0.050$           | 0.01 mg.L <sup>-1</sup> | $F(5,24)=6.447; P<0.050$        | 10 mg.L <sup>-1</sup>   | $F(3,16)=0.482; P=0.700$          | 4.25 mg.L <sup>-1</sup> |
|                         | 32              | <i>heart rate</i>            | factorial ANOVA | $F(5,108)=30.821; P<0.050$         | 0 mg.L <sup>-1</sup>    | $F(5,108)=3.334; P<0.050$       | 10 mg.L <sup>-1</sup>   | $F(3,68)=2.638; P=0.056$          | 4.25 mg.L <sup>-1</sup> |
|                         | 56              | <i>heart rate</i>            |                 |                                    | 0.01 mg.L <sup>-1</sup> |                                 | 100 mg.L <sup>-1</sup>  |                                   | 4.25 mg.L <sup>-1</sup> |
|                         | 56              | <i>hatching rate</i>         | chi-square test | $\chi^2=5.825; DF=5; P=0.324$      | 100 mg.L <sup>-1</sup>  | $\chi^2=6.529; DF=5; P=0.258$   | 100 mg.L <sup>-1</sup>  | $\chi^2=7.269; DF=5; P=0.064$     | 4.25 mg.L <sup>-1</sup> |
|                         | 80              | <i>burst swimming</i>        | one-way ANOVA   | $F(5,18)=1.776; P=0.169$           | 100 mg.L <sup>-1</sup>  | $F(5,18)=1.000; P=0.446$        | 100 mg.L <sup>-1</sup>  | $F(3,12)=1.986; P=0.170$          | 4.25 mg.L <sup>-1</sup> |
|                         | 80              | <i>survival</i>              | chi-square test | $\chi^2=5.740; DF=5; P=0.332$      | 100 mg.L <sup>-1</sup>  | $\chi^2=1.817; DF=5; P=0.874$   | 100 mg.L <sup>-1</sup>  | $\chi^2=0.878; DF=5; P=0.831$     | 4.25 mg.L <sup>-1</sup> |

**Table S2.** Particles Characterization

|                     |                    | <b>Pristine</b>   | <b>Heat-Treated</b> |
|---------------------|--------------------|-------------------|---------------------|
| <b>Dry</b>          | <b>TEM Dp (nm)</b> | $20 \pm 5$        | $38 \pm 6$          |
| <b>Mili-Q Water</b> | <b>DLS Dp (nm)</b> | 27.03             | 37.43               |
|                     | <b>ZP (mV)</b>     | $-24.17 \pm 0.04$ | $20.77 \pm 0.51$    |
|                     | <b>pH</b>          | 7.29              | 7.28                |
| <b>Freshwater</b>   | <b>DLS Dp (nm)</b> | 629.43            | 580.87              |
|                     | <b>ZP (mV)</b>     | $-6.47 \pm 0.50$  | $-1.12 \pm 0.51$    |
|                     | <b>pH</b>          | 7.30              | 7.70                |

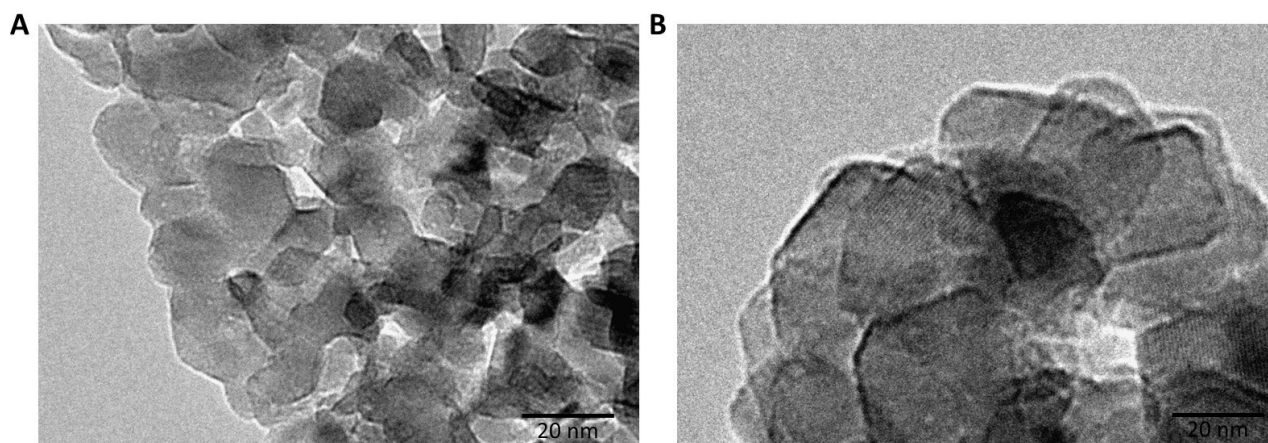

**Figure S1.** Effective  $\text{TiO}_2$  **A-** pristine nanoparticles, **B-** heat-treated nanoparticles size by Transmission Scanning Microscopy (TEM).
